# Supplementary material
Source: publisher figshare collection journal article supplement (https://acs.figshare.com/ndownloader/files/4449970)

**Fig. S1** Transmission spectrum of M10-H at 1.0 V. Energy window imposed by the bias is shown in a box in the abscissa.

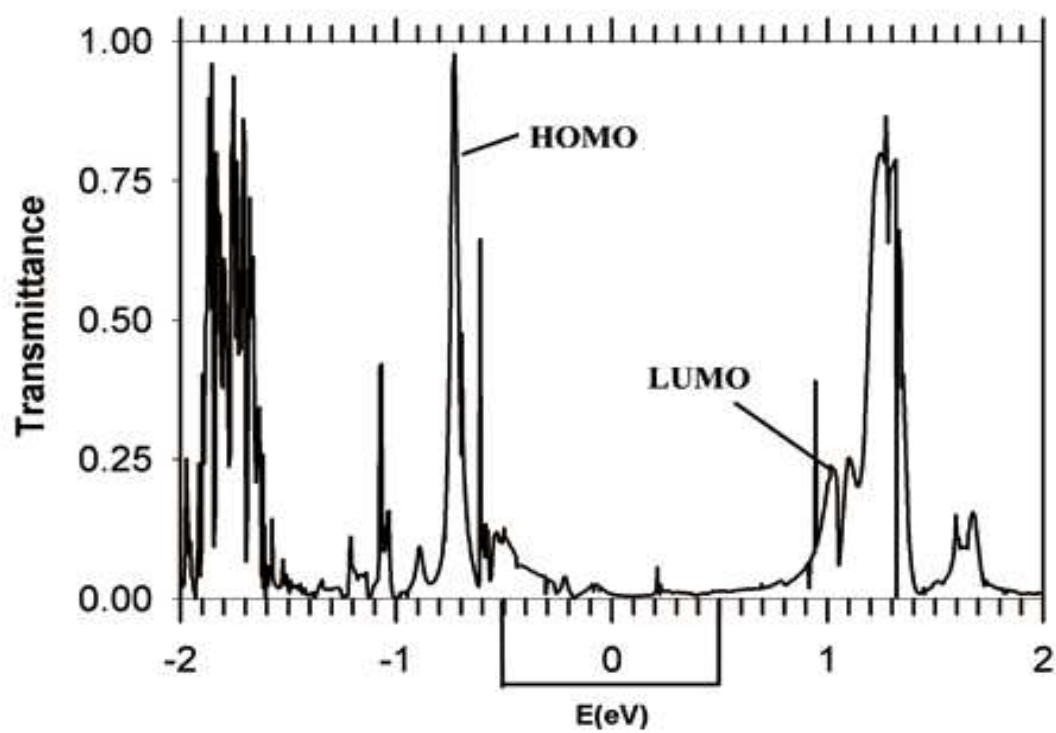

**Fig. S2** Voltage drop across regions in Fig. 2 for M10-H at 1.0 V.

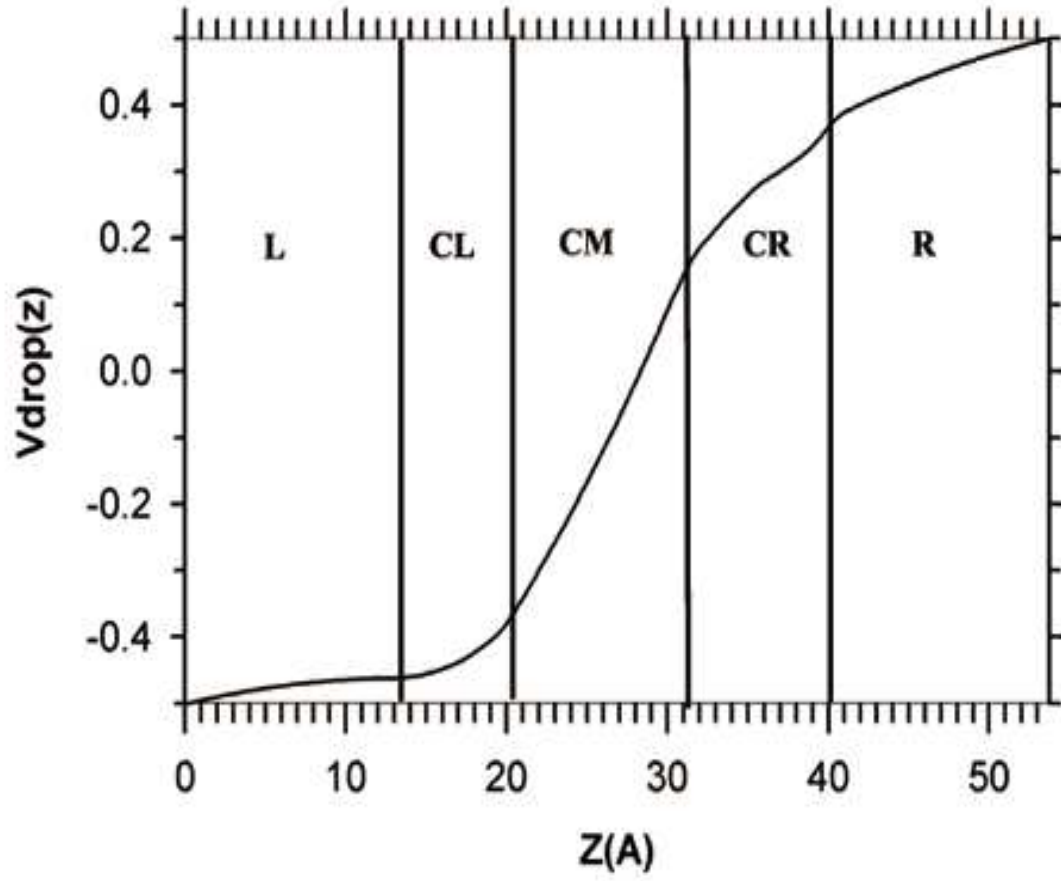

**Fig. S3** Transmission spectrum of M10-H at 1.5 V. Energy window imposed by the bias is shown in a box in the abscissa.

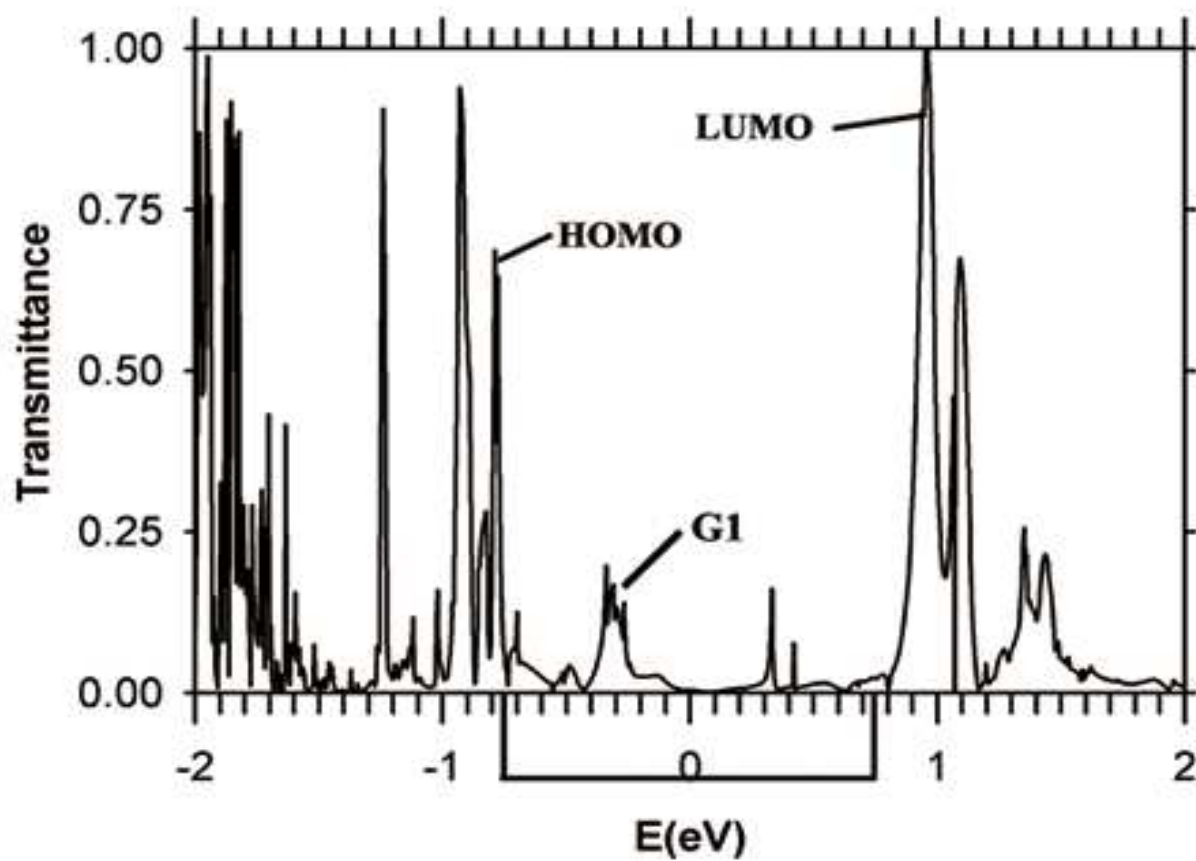

**Fig. S4** Transmission spectrum of M10-H at 1.4 V. Energy window imposed by the bias is shown in a box in the abscissa.

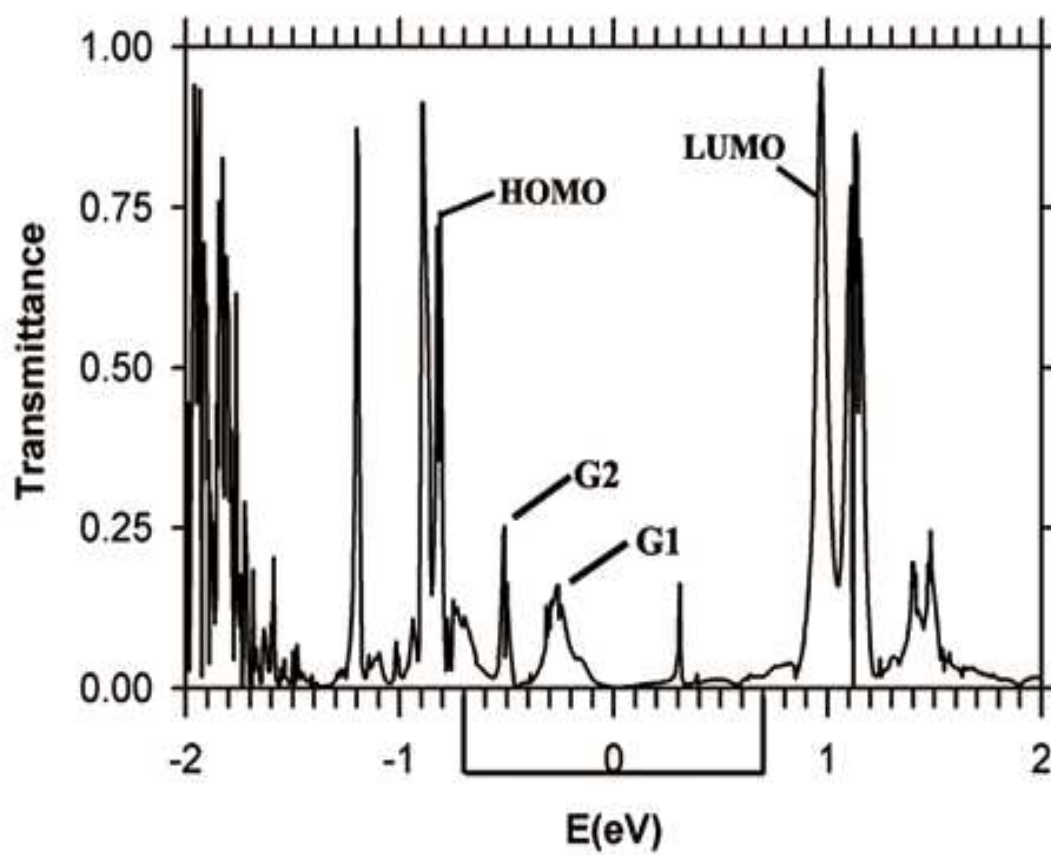

**Fig. S5** Projected density of states (PDOS) of M10-H onto the molecular region at 1.4 V.

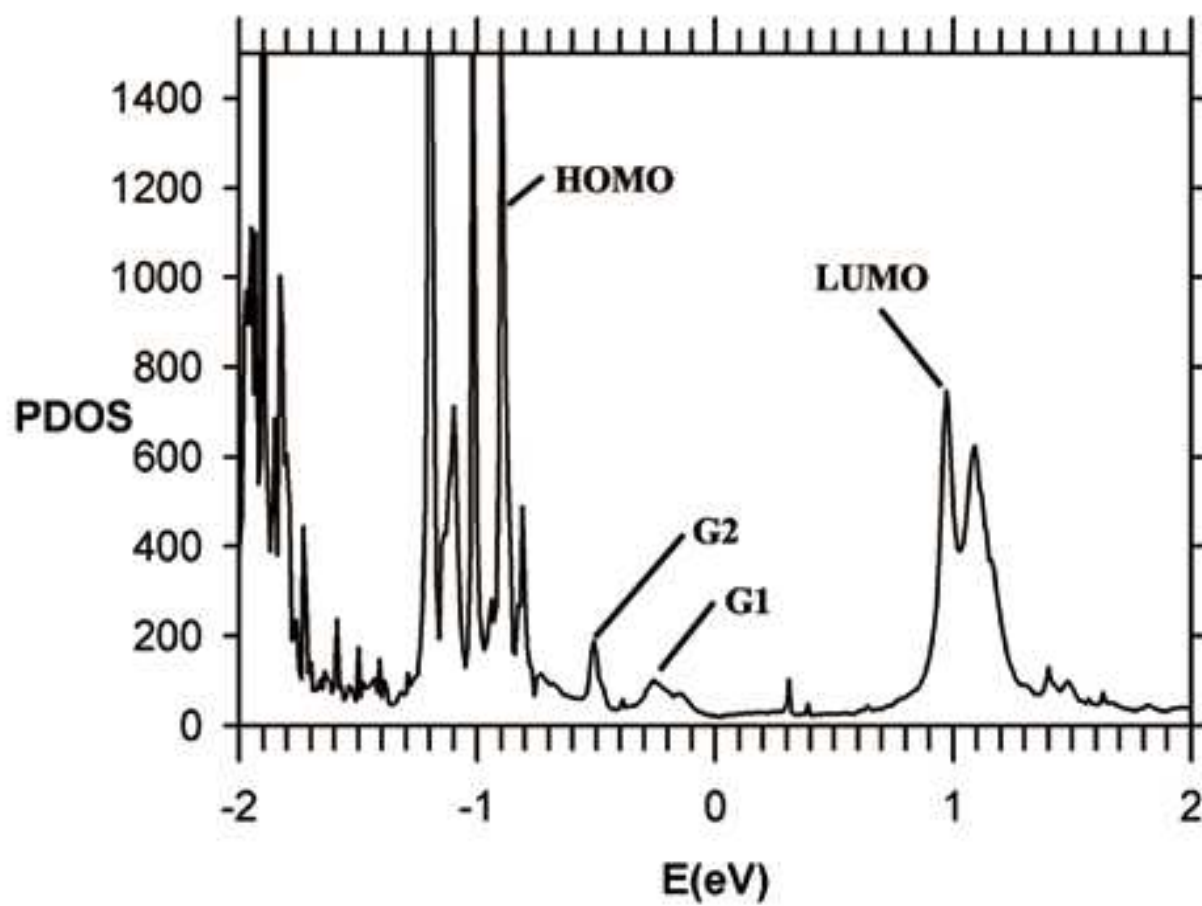

**Fig. S6** Projected density of states (PDOS) of M10-H onto the surface of the CL region at 1.4 V.

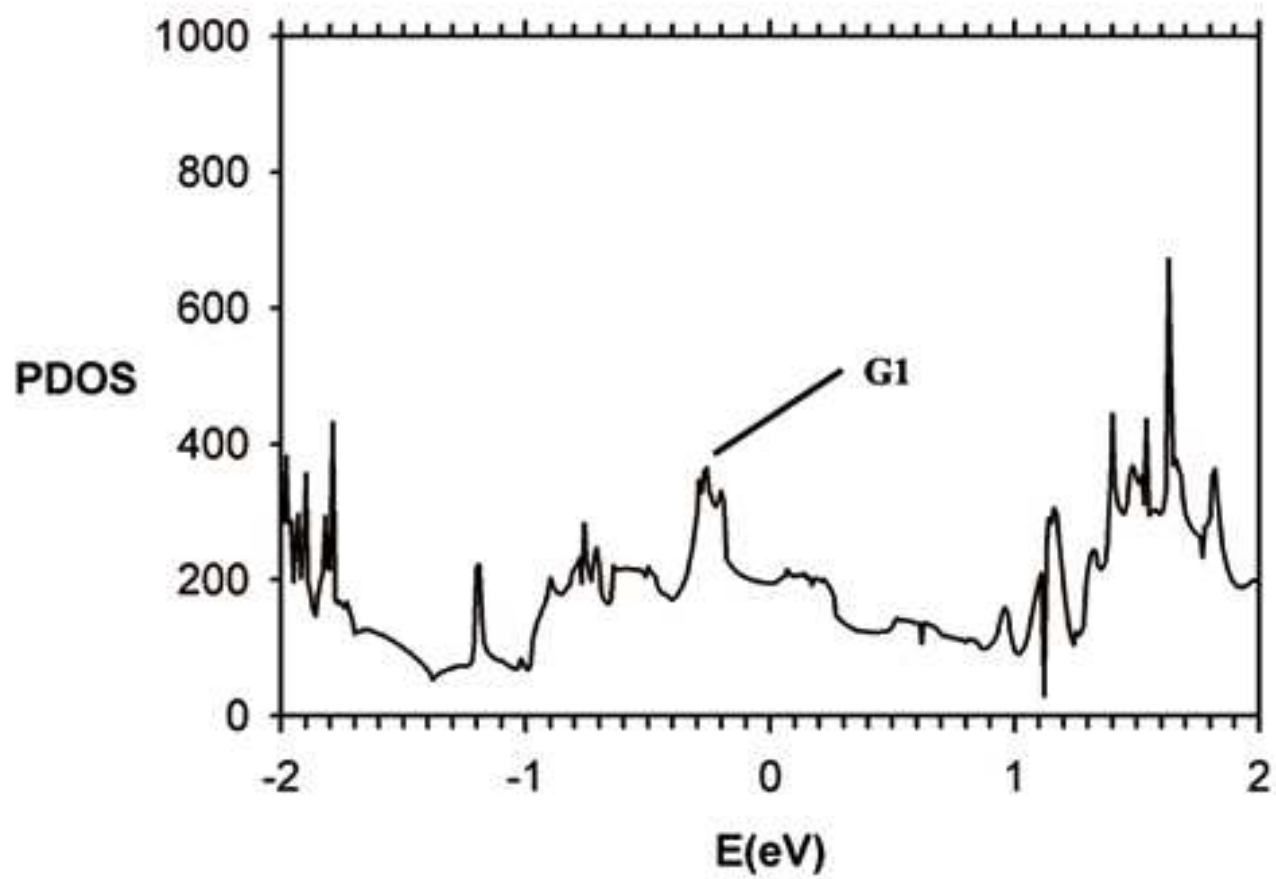

**Fig. S7** Projected density of states (PDOS) of M10-H onto the surface of the CR region at 1.4 V.

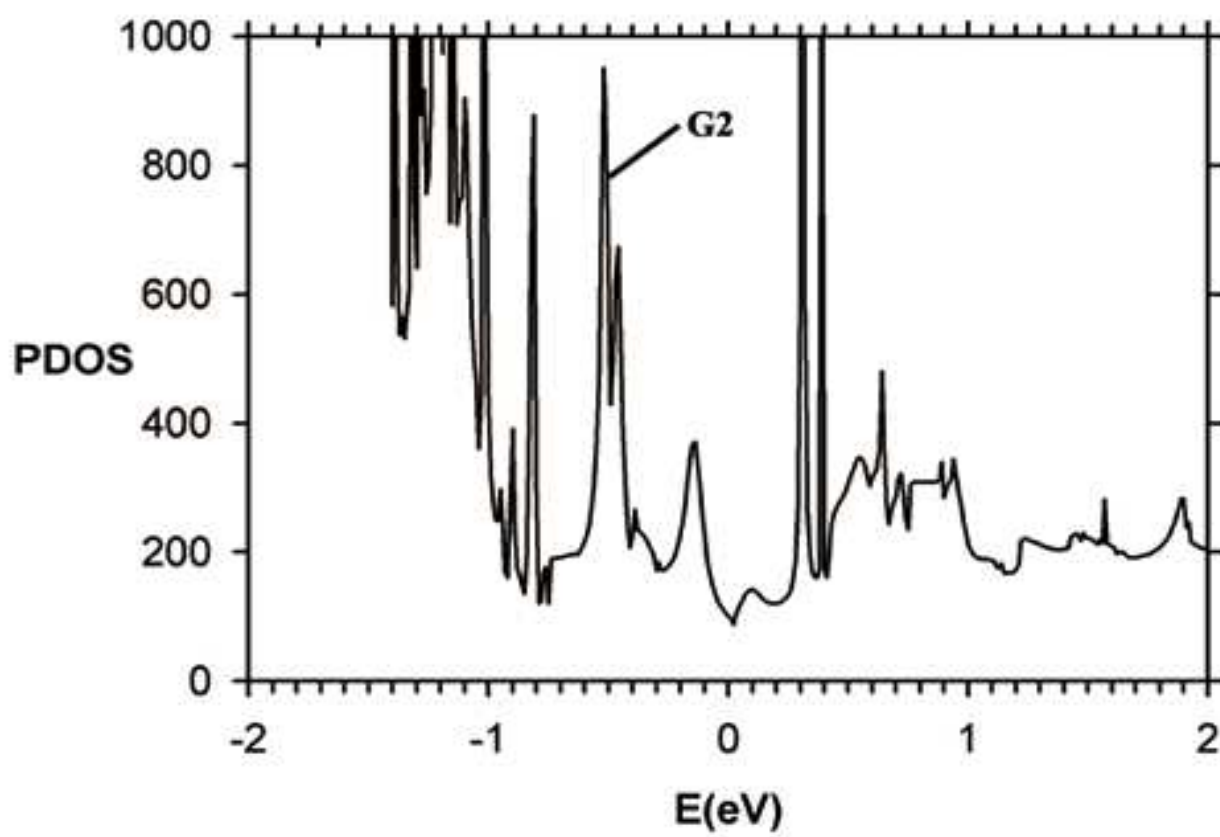

**Fig. S8** Transmission spectrum of M10-H at 2.3 V. Energy window imposed by the bias is shown in a box in the abscissa.

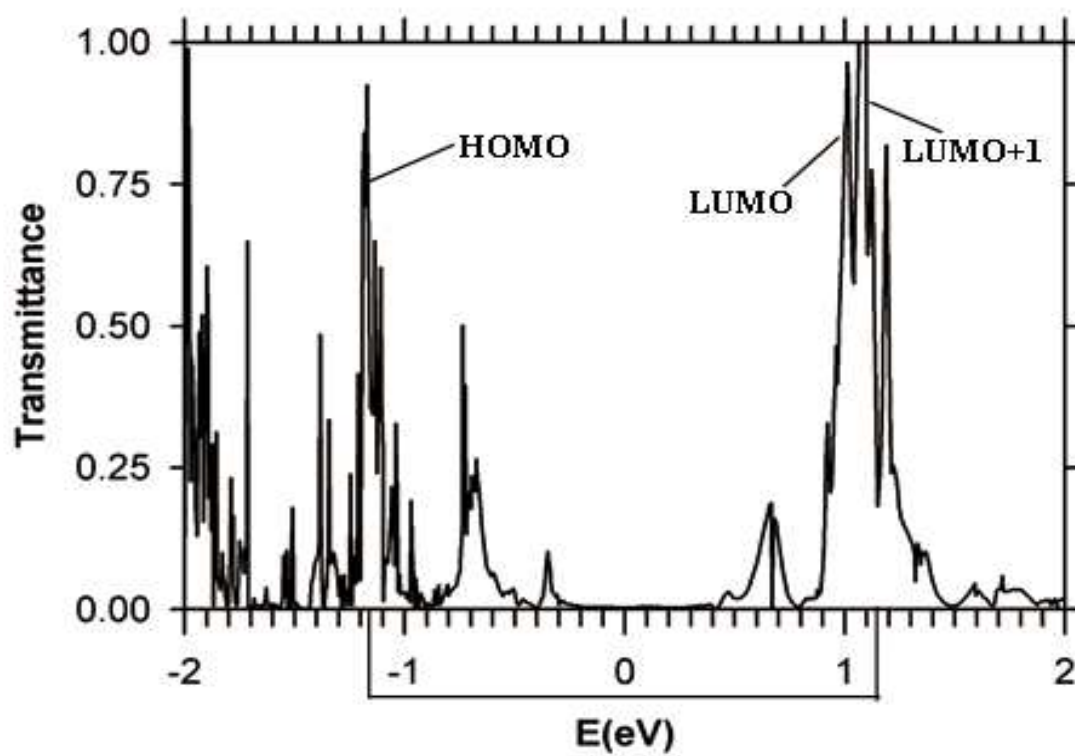



**Fig. S9** Projected density of states (PDOS) of M10-Cl3 onto the surface of the CR region -2.4 V.

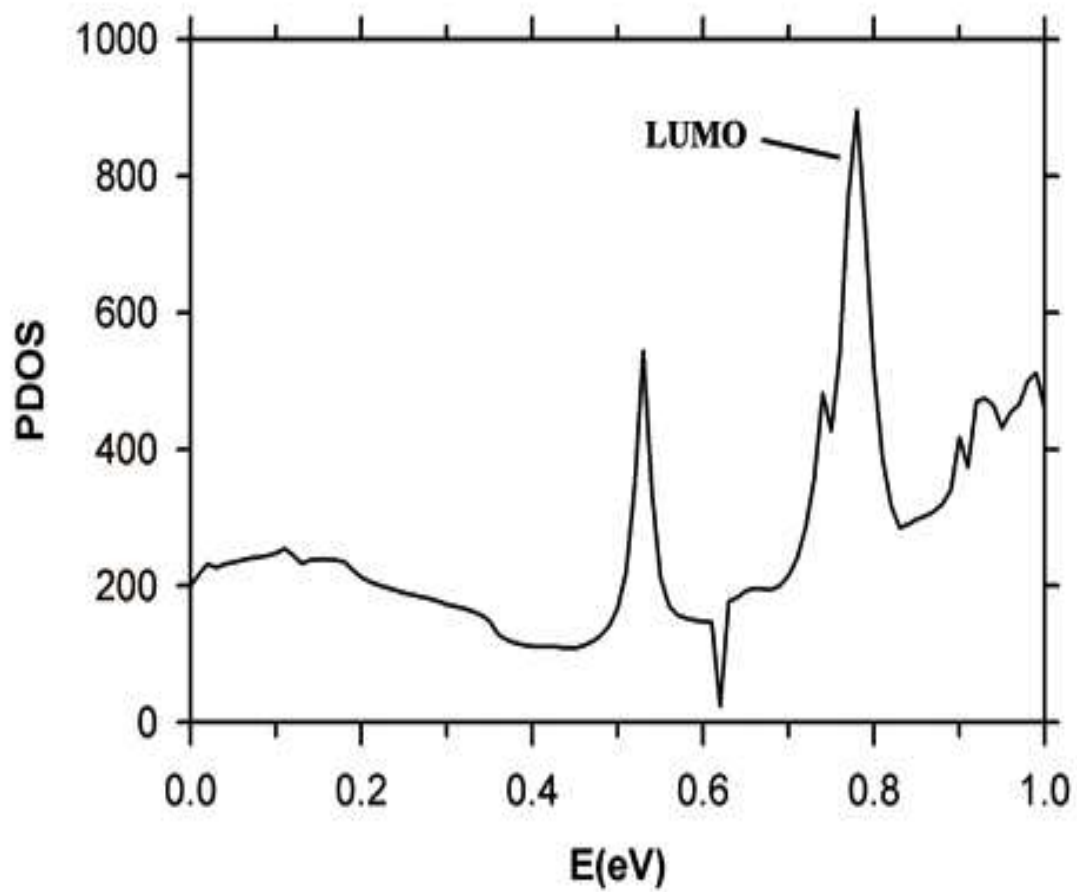

**Fig. S10** Projected density of states (PDOS) of M10-Cl3 onto the surface of the CR region at -2.5 V.

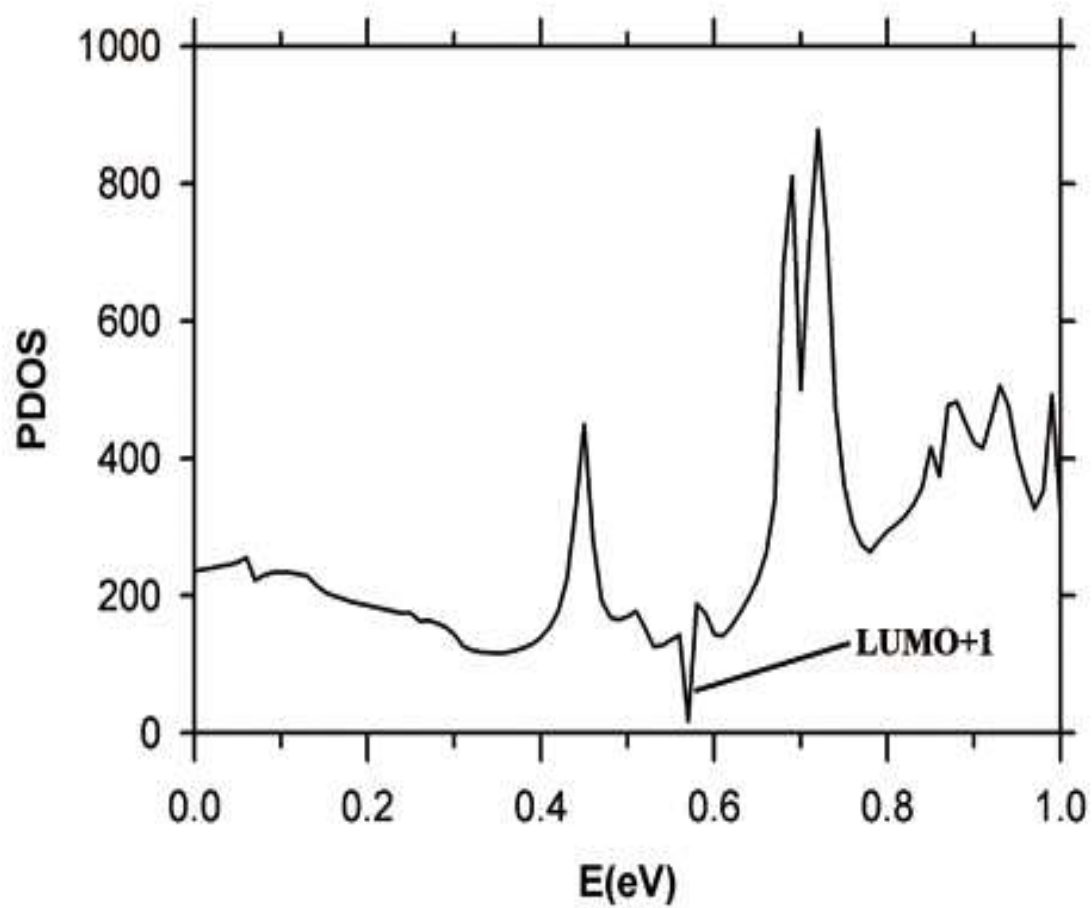

Supplement: Supplementary file 1 [file 4449970]
